# Supplementary material for: Green Space Quality and Health: A Systematic Review
Source: MDPI journal article supplement (doi:10.3390/ijerph182111028), 2021-10-20
Supplement: s1 [file s1]

## Green space quality and health: a systematic review (PY Nguyen et al, 2021)

### Supplementary file S2. Quality assessment of included studies

For the list of questions assessed for each type of studies, see <https://www.nhlbi.nih.gov/health-topics/study-quality-assessment-tools>

For ecological studies, the adapted questions are:

Q14 (modified): Were key potential confounding variables measured at the ecological unit level and adjusted statistically for their impact on the relationship between exposure(s) and outcome(s)?

Q15 (added): Was spatial autocorrelation addressed?

Q16 (added): Was variation of outcome distribution within each unit of analysis accounted for in any way?

### Controlled intervention studies (quasi-experimental)

| Study          | Q1 | Q2  | Q3 | Q4 | Q5 | Q6  | Q7  | Q8  | Q9 | Q10 | Q11 | Q12 | Q13 | Q14 | Total score | Total applicable | Adjusted score |
|----------------|----|-----|----|----|----|-----|-----|-----|----|-----|-----|-----|-----|-----|-------------|------------------|----------------|
| Dobbinson_2020 | N  | N/A | Y  | N  | N  | Y   | N/R | N/R | Y  | Y   | Y   | N   | Y   | Y   | 7           | 13               | 0.54           |
| Droomers_2015  | N  | N/A | Y  | N  | N  | N/R | N   | N/R | Y  | Y   | N   | N   | Y   | Y   | 5           | 13               | 0.38           |
| Zhang_2017     | N  | N/A | Y  | N  | N  | N   | N   | N   | Y  | Y   | N   | N   | Y   | Y   | 5           | 13               | 0.38           |

### Before-after studies

| Study         | Q1 | Q2 | Q3 | Q4 | Q5 | Q6 | Q7 | Q8 | Q9  | Q10 | Q11 | Q12 | Total score | Total applicable | Adjusted score |
|---------------|----|----|----|----|----|----|----|----|-----|-----|-----|-----|-------------|------------------|----------------|
| Marselle_2015 | Y  | Y  | N  | N  | N  | Y  | Y  | N  | N/A | N   | N   | N/A | 4           | 10               | 0.40           |

### Case-controlled studies (case-crossover)

| Study     | Q1 | Q2 | Q3 | Q4 | Q5 | Q6 | Q7 | Q8 | Q9 | Q10 | Q11 | Q12 | Total score | Total applicable | Adjusted score |
|-----------|----|----|----|----|----|----|----|----|----|-----|-----|-----|-------------|------------------|----------------|
| Stas_2021 | Y  | Y  | N  | Y  | Y  | Y  | N  | Y  | N  | Y   | Y   | Y   | 9           | 12               | 0.75           |

### Observational cohort and cross-sectional studies

| Study             | Q1 | Q2 | Q3 | Q4 | Q5 | Q6 | Q7 | Q8  | Q9 | Q10 | Q11 | Q12 | Q13 | Q14 | Total score | Total applicable | Adjusted score |
|-------------------|----|----|----|----|----|----|----|-----|----|-----|-----|-----|-----|-----|-------------|------------------|----------------|
| Astell-Burt_2019  | Y  | Y  | N  | Y  | Y  | N  | N  | N/A | Y  | N   | Y   | Y   | N   | Y   | 7           | 13               | 0.54           |
| Astell-Burt_2020a | Y  | Y  | N  | Y  | Y  | N  | N  | N/A | Y  | N   | Y   | Y   | N   | Y   | 7           | 13               | 0.54           |
| Astell-Burt_2020b | Y  | Y  | N  | Y  | Y  | N  | N  | N/A | Y  | N   | Y   | Y   | N   | Y   | 7           | 13               | 0.54           |

| Study                | Q1 | Q2 | Q3  | Q4 | Q5 | Q6 | Q7 | Q8  | Q9 | Q10 | Q11 | Q12 | Q13 | Q14 | Total score | Total applicable | Adjusted score |
|----------------------|----|----|-----|----|----|----|----|-----|----|-----|-----|-----|-----|-----|-------------|------------------|----------------|
| Astell-Burt_2020c    | Y  | Y  | N   | Y  | Y  | N  | N  | N/A | Y  | N   | N   | Y   | N   | Y   | 6           | 13               | 0.46           |
| Astell-Burt_2021     | Y  | Y  | N   | Y  | Y  | N  | N  | N/A | Y  | N   | Y   | Y   | N   | Y   | 7           | 13               | 0.54           |
| Bai_2013             | Y  | Y  | N   | N  | N  | N  | N  | N/A | Y  | N   | N   | N   | N/A | Y   | 3           | 12               | 0.25           |
| Bird_2016            | Y  | Y  | N   | Y  | N  | N  | N  | N/A | Y  | Y   | Y   | Y   | Y   | Y   | 8           | 13               | 0.62           |
| Bojorquez_2018       | Y  | Y  | Y   | Y  | N  | N  | N  | Y   | Y  | N   | Y   | N   | N/A | Y   | 7           | 13               | 0.54           |
| Camargo_2017         | Y  | Y  | Y   | Y  | N  | N  | N  | N/A | N  | N   | Y   | N   | N/A | Y   | 5           | 12               | 0.42           |
| Carter_2014          | Y  | Y  | N   | Y  | N  | N  | N  | N/A | Y  | N   | Y   | N   | N/A | Y   | 5           | 12               | 0.42           |
| Dillen_2012          | Y  | Y  | N   | Y  | N  | Y  | N  | N/A | N  | N   | Y   | Y   | N/A | Y   | 6           | 12               | 0.50           |
| Donovan_2018         | Y  | Y  | Y   | Y  | N  | N  | N  | N/A | Y  | N   | Y   | Y   | N/R | Y   | 7           | 13               | 0.54           |
| Dzhambov_2018        | Y  | Y  | Y   | Y  | N  | N  | N  | N/A | N  | N   | Y   | N   | N/A | Y   | 5           | 12               | 0.42           |
| Egorov_2020          | Y  | Y  | N/A | Y  | N  | Y  | Y  | Y   | Y  | N   | Y   | Y   | N/A | Y   | 9           | 12               | 0.75           |
| Feng_2018            | Y  | Y  | Y   | Y  | N  | N  | N  | N/A | N  | Y   | Y   | N   | Y   | Y   | 7           | 13               | 0.54           |
| Feng_2019            | Y  | Y  | Y   | Y  | N  | N  | N  | N/A | N  | N   | N   | N   | Y   | Y   | 5           | 13               | 0.38           |
| Francis_2012         | Y  | Y  | N   | Y  | N  | Y  | Y  | Y   | Y  | N   | Y   | N   | Y   | Y   | 9           | 14               | 0.64           |
| Gernes_2019          | Y  | Y  | Y   | Y  | N  | N  | N  | N/A | Y  | N   | Y   | Y   | Y   | Y   | 8           | 13               | 0.62           |
| Herranz-Pascual_2019 | Y  | Y  | N/A | Y  | N  | N  | N  | N/A | N  | N   | N   | Y   | N/A | Y   | 4           | 11               | 0.36           |
| Honold_2016          | Y  | Y  | N   | Y  | Y  | Y  | Y  | N/A | Y  | N   | Y   | Y   | N/A | Y   | 9           | 12               | 0.75           |
| Jarvis_2020          | Y  | Y  | Y   | Y  | N  | N  | N  | N/A | Y  | N   | N   | Y   | N/A | Y   | 6           | 12               | 0.50           |
| Jiang_2020           | Y  | N  | N/R | Y  | N  | N  | N  | N/A | Y  | N   | Y   | Y   | N/A | Y   | 5           | 12               | 0.42           |
| Kim_2014             | Y  | Y  | N/R | Y  | N  | N  | N  | N   | Y  | N   | Y   | Y   | N/A | Y   | 6           | 13               | 0.46           |
| Kim_2016             | Y  | Y  | N/R | Y  | N  | N  | N  | N   | Y  | N   | N   | Y   | N/A | Y   | 5           | 13               | 0.38           |
| Kruize_2020          | Y  | Y  | N   | Y  | N  | N  | N  | N/A | Y  | N   | Y   | Y   | N/A | Y   | 6           | 12               | 0.50           |
| Leng_2020            | Y  | N  | N/R | Y  | N  | N  | N  | N/A | Y  | N   | Y   | Y   | N/A | Y   | 5           | 12               | 0.42           |
| McCarthy_2017        | Y  | Y  | Y   | Y  | N  | N  | N  | Y   | Y  | N   | Y   | N   | N/A | Y   | 7           | 13               | 0.54           |
| McEachan_2018        | Y  | Y  | Y   | Y  | N  | N  | N  | N/A | N  | N   | Y   | N   | Y   | Y   | 6           | 13               | 0.46           |
| Nishigaki_2020       | Y  | Y  | Y   | Y  | N  | Y  | Y  | N/A | Y  | N   | Y   | Y   | N/A | Y   | 9           | 12               | 0.75           |
| Orstad_2020          | Y  | Y  | Y   | Y  | N  | N  | N  | N/A | Y  | N   | N   | N   | N/A | Y   | 5           | 12               | 0.42           |
| Parmes_2020          | Y  | Y  | Y   | N  | N  | N  | N  | N/A | Y  | N   | N   | Y   | N   | Y   | 5           | 13               | 0.38           |
| Pazhouhanfar_2018    | Y  | N  | N/A | Y  | N  | N  | N  | N/A | N  | N   | Y   | N   | N/A | N   | 2           | 11               | 0.18           |
| Pope_2018            | Y  | Y  | N   | Y  | Y  | N  | N  | N/A | N  | N   | Y   | Y   | N/A | Y   | 6           | 12               | 0.50           |
| Putra_2020           | Y  | Y  | Y   | Y  | N  | N  | N  | N/A | N  | N   | Y   | N   | N/R | Y   | 5           | 13               | 0.38           |
| Reid_2017            | Y  | N  | N   | Y  | N  | N  | N  | N   | Y  | N   | N   | Y   | N/A | Y   | 4           | 13               | 0.31           |
| Richardson_2018      | Y  | Y  | N/A | Y  | N  | N  | N  | N/A | N  | N   | Y   | Y   | Y   | Y   | 6           | 12               | 0.50           |
| Rundle_2013          | Y  | Y  | N/A | Y  | N  | N  | N  | Y   | Y  | Y   | Y   | Y   | N/A | Y   | 8           | 12               | 0.67           |
| Stark_2014           | Y  | Y  | Y   | Y  | N  | N  | N  | Y   | Y  | Y   | N   | Y   | N/A | Y   | 8           | 13               | 0.62           |
| Sugiyama_2009        | Y  | N  | N   | Y  | N  | N  | N  | Y   | Y  | N   | N   | N   | N/A | Y   | 4           | 13               | 0.31           |

| Study       | Q1 | Q2 | Q3  | Q4 | Q5 | Q6 | Q7 | Q8  | Q9 | Q10 | Q11 | Q12 | Q13 | Q14 | Total score | Total applicable | Adjusted score |
|-------------|----|----|-----|----|----|----|----|-----|----|-----|-----|-----|-----|-----|-------------|------------------|----------------|
| Tan_2019    | Y  | Y  | N   | Y  | N  | N  | N  | N   | Y  | N   | Y   | Y   | N/A | Y   | 6           | 13               | 0.46           |
| Vries_2013  | Y  | Y  | N   | Y  | N  | Y  | N  | N/A | Y  | N   | Y   | Y   | N/A | Y   | 7           | 12               | 0.58           |
| Wood_2017   | Y  | Y  | N   | Y  | N  | Y  | Y  | Y   | Y  | N   | Y   | Y   | N   | Y   | 9           | 14               | 0.64           |
| Wood_2018   | Y  | Y  | N/A | Y  | N  | N  | N  | N/A | Y  | Y   | Y   | Y   | N/A | Y   | 7           | 11               | 0.64           |
| Wyles_2019  | Y  | Y  | N   | Y  | N  | Y  | Y  | N/A | Y  | N   | N   | N   | N/A | Y   | 6           | 12               | 0.50           |
| Zhang_2019a | Y  | Y  | N/R | Y  | N  | N  | N  | N/A | Y  | N   | Y   | N   | N/A | Y   | 5           | 12               | 0.42           |
| Zhang_2019b | Y  | Y  | Y   | Y  | N  | N  | N  | N/A | Y  | N   | Y   | Y   | N/A | Y   | 7           | 12               | 0.58           |
| Zhu_2020    | Y  | Y  | Y   | Y  | N  | N  | N  | N   | Y  | N   | Y   | N   | N/A | N   | 5           | 13               | 0.38           |

## Ecological studies

| Study        | Q1 | Q2 | Q3  | Q4 | Q5 | Q6 | Q7 | Q8  | Q9 | Q10 | Q11 | Q12 | Q13 | Q14 | Q15 | Q16 | Total score | Total applicable | Adjusted score |
|--------------|----|----|-----|----|----|----|----|-----|----|-----|-----|-----|-----|-----|-----|-----|-------------|------------------|----------------|
| Aerts_2020   | Y  | Y  | N/A | Y  | N  | N  | N  | N   | Y  | N   | Y   | Y   | N/A | Y   | Y   | N   | 7           | 14               | 0.50           |
| Dennis_2020  | Y  | Y  | N/A | Y  | N  | N  | N  | N   | Y  | N   | Y   | Y   | N/A | Y   | Y   | Y   | 8           | 14               | 0.57           |
| Jaafari_2020 | Y  | N  | N/A | Y  | N  | N  | N  | N/A | N  | N   | Y   | Y   | N/A | N   | N   | N   | 3           | 13               | 0.23           |
| Jonker_2014  | Y  | N  | N/R | N  | N  | N  | N  | N/A | N  | N   | Y   | Y   | N/A | Y   | Y   | Y   | 5           | 14               | 0.36           |
| Kim_2021     | Y  | Y  | N/A | Y  | N  | N  | N  | N   | Y  | N   | Y   | Y   | N/A | Y   | Y   | Y   | 8           | 14               | 0.57           |
| Lai_2019     | Y  | N  | N/A | N  | N  | N  | N  | N   | Y  | N   | Y   | Y   | N/A | Y   | N   | Y   | 5           | 14               | 0.36           |
| Mears_2020a  | Y  | Y  | N/A | Y  | N  | N  | N  | N/A | N  | N   | Y   | Y   | N/A | Y   | N   | N   | 5           | 13               | 0.38           |
| Mears_2020b  | Y  | Y  | N/A | Y  | N  | N  | N  | N/A | N  | N   | N   | Y   | N/A | Y   | N   | N   | 4           | 13               | 0.31           |
| Ngom_2016    | Y  | Y  | N/A | Y  | N  | N  | N  | N   | Y  | N   | Y   | Y   | N/A | Y   | N   | N   | 6           | 14               | 0.43           |
| Sander_2017  | Y  | Y  | N/A | Y  | N  | N  | N  | N   | Y  | N   | N   | Y   | N/A | Y   | Y   | Y   | 7           | 14               | 0.50           |
| Shen_2017    | Y  | Y  | N/A | Y  | N  | N  | N  | N/A | Y  | N   | Y   | Y   | N/A | N   | N   | N   | 5           | 13               | 0.38           |
| Tsai_2016    | Y  | Y  | N/A | Y  | N  | Y  | Y  | N/A | N  | N   | N   | Y   | N/A | Y   | N   | N   | 6           | 13               | 0.46           |
| Wang_2019    | Y  | Y  | N/A | Y  | N  | N  | N  | N   | Y  | N   | Y   | Y   | N/A | Y   | Y   | Y   | 8           | 14               | 0.57           |
| Wheeler_2015 | Y  | Y  | Y   | Y  | N  | Y  | Y  | N   | Y  | N   | N   | Y   | N/A | Y   | N   | N   | 8           | 15               | 0.53           |
| Wu_2017      | Y  | Y  | N/A | Y  | N  | N  | N  | N   | Y  | N   | Y   | Y   | N/A | Y   | Y   | N   | 7           | 14               | 0.50           |
| Wu_2018      | Y  | Y  | N/A | Y  | N  | Y  | Y  | N   | Y  | N   | Y   | Y   | N/A | Y   | Y   | Y   | 10          | 14               | 0.71           |
