# Supplementary material for: Green Space Quality and Health: A Systematic Review
Source: Int J Environ Res Public Health. 2021 Oct 20;18(21):11028. doi: 10.3390/ijerph182111028 (PMC8582763; doi:10.3390/ijerph182111028)
Supplement: Supplementary file 1 [file ijerph-18-11028-s001.zip]

Archive with 4 entries (4 files):
- ijerph-1381739-supplementary/Green space quality and health - R1 - Supplementary file S1.pdf
- ijerph-1381739-supplementary/Green space quality and health - R1 - Supplementary file S2.pdf
- ijerph-1381739-supplementary/Green space quality and health - R1 - Supplementary file S3.pdf
- ijerph-1381739-supplementary/Green space quality and health - R1 - Supplementary file S4.pdf
